# Supplementary material
Source: publisher site journal article supplement (https://www.dovepress.com/article/556045)
Supplement: Supplementary file 1 [file 556045%20Supplemental%20Table%201.docx]

**Supplemental Table 1: Clinical trials to these coding genes which include: JAK/STAT3, mucin 1, VEGFA, IGF-1, GSK3β, EGFR, ROS1 and PIK3CB.**

| **Target gene** | **Medicine** | **Number** | **Title of Clinical Trials** |
| --- | --- | --- | --- |
| **JAK** | JAK2-Inhibitor Ruxolitinib | NCT01594216 | Ruxolitinib in Estrogen Receptor Positive Breast Cancer |
| NCT03012230 | Pembrolizumab and Ruxolitinib Phosphate in Treating Patients With Metastatic Stage IV Triple Negative Breast Cancer |
| NCT02066532 | Ruxolitinib in Combination With Trastuzumab in Metastatic HER2 Positive Breast Cancer |
| NCT02120417 | A Study of Ruxolitinib in Combination With Capecitabine in Subjects With Advanced or Metastatic HER2-negative Breast Cancer |
| **STAT** | STAT3 Inhibitor TTI-101 | NCT05384119 | Phase 1b/​2 Study of TTI-101 in Combination for Patients With Metastatic Hormone Receptor-Positive and HER2-Negative Breast Cancer |
| silibinin as STAT3 inhibitor | NCT05689619 | SILibinin in NSCLC and BC Patients With Single Brain METastasis (SILMET) (SILMET) |
| **mucin 1** | Recombinant Vaccinia Virus That Expresses DF3/MUC1 | NCT00003761 | Vaccine Therapy in Treating Patients With Metastatic Breast Cancer |
| HuMNC2-CAR44 CAR T cells or huMNC2-CAR22 CAR T cells | NCT04020575 | Autologous huMNC2-CAR44 or huMNC2-CAR22 T Cells for Breast Cancer Targeting Cleaved Form of MUC1 (MUC1*) |
| Recombinant vaccinia-MUC1 vaccine | NCT00071942 | Vaccine Therapy in Treating Patients With Metastatic Breast Cancer |
| PANVAC-V | NCT00179309 | Docetaxel Alone or in Combination With Vaccine to Treat Breast Cancer |
| MUC1-KLH vaccine/QS21 | NCT00004156 | Vaccine Therapy in Treating Patients With Breast Cancer |
| Ad-sig-hMUC-1/ecdCD40L vaccine | NCT00706615 | Vaccine Therapy in Treating Women With Previously Treated Metastatic Breast Cancer |
| P-MUC1C-ALLO1 CAR-T cells | NCT05239143 | P-MUC1C-ALLO1 Allogeneic CAR-T Cells in the Treatment of Subjects With Advanced or Metastatic Solid Tumors |
| **VEGFA** | BNT327 | NCT06449222 | Safety and Preliminary Effectiveness of BNT327, an Investigational Therapy for Breast Cancer, When Given in Combination With Chemotherapy |
| NCT06827236 | A Clinical Study to Find the Optimal Dose of an Investigational Treatment Called BNT323 When Used in Combination With Another Investigational Treatment, BNT327, and to Test if That Combination Treatment is Safe and Beneficial for Patients With Advanced Breast Cancer |
| NCT07173751 | ROSETTA Breast-01: The Effects and Safety of Pumitamig in Patients With Triple-Negative Breast Cancer |
| Aflibercept | NCT00369655 | VEGF Trap in Treating Patients With Metastatic Breast Cancer |
| NCT01843725 | Phase 1 Study Testing the Combination of Aflibercept and Capecitabine in Metastatic Digestive and Breast Cancers (MOMENTUM1) |
| Bevacizumab | NCT00095706 | Treatment of HER2-Positive Metastatic Breast Cancer With Herceptin and Bevacizumab (Antibodies Against HER2 and VEGF) |
| NCT00281528 | Weekly vs. Every 2 Week vs. Every 3 Week Administration of ABI-007 (Abraxane)/​Bevacizumab Combination in Metastatic Breast Cancer |
| NCT01195298 | Bevacizumab and Capecitabine in Treatment of Elderly Patients With Metastatic Breast Cancer |
| NCT00394082 | ABI-007 In Combination With Bevacizumab in Women With Metastatic Breast Cancer |
| NCT00444535 | Lapatinib and Bevacizumab for Metastatic Breast Cancer |
| NCT00915603 | Trial of Paclitaxel/​Bevacizumab +/​- Everolimus for Patients With HER2-Negative Metastatic Breast Cancer |
| NCT01025349 | Salvage Therapy With Bevacizumab Plus Docetaxel and Cisplatin for Taiwanese Metastatic Breast Cancer |
| NCT00467012 | Phase Ⅱ Clinical Study of R435 (Bevacizumab) in Combination With Paclitaxel in Patients With Inoperable Metastatic Breast Cancer |
| NCT05781633 | The Efficacy and Safety of Eutideron, Etoposide, and Bevacizumab in Patients With Brain Metastases From Breast Cancer. |
| NCT01941407 | First Line Metastatic Breast Cancer Treatment (ESMERALDA) (ESMERALDA) |
| NCT00600340 | 2-arm Trial of Paclitaxel Plus Bevacizumab vs. Capecitabine Plus Bevacizumab (TURANDOT) |
| NCT00517361 | Phase II Study of Carboplatin and Bevacizumab (Avastin) for ER Neg, PR Neg, and HER2/​Neu Neg Metastatic Breast Cancer |
| NCT01745757 | Cohort Study of Prospective Validation of Predictive Factors and Biological Imaging of Response to Bevacizumab and Paclitaxel in Patients With Metastatic Breast Cancer (COMET) |
| NCT00608972 | Phase II Trial of Doxil, Carboplatin, Bevacizumab in Triple Negative Untreated Metastatic Breast Cancer |
| NCT00262067 | A Study Evaluating the Efficacy and Safety of Bevacizumab in Combination With Chemotherapy in Untreated Metastatic Breast Cancer (RIBBON 1) |
| NCT00405938 | Bevacizumab Given With Either Anastrozole or Fulvestrant With Trastuzumab for Postmenopausal Metastatic Breast Cancer |
| NCT06539559 | Efficacy and Resistant Mechanism of Eribulin and Bevacizumab for Advanced HER2 Negative Breast Cancer |
| NCT00434356 | A Study of Sunitinib in Combination With Bevacizumab and Paclitaxel in Previously Untreated Patients With Metastatic Breast Cancer (SABRE-B) |
| NCT00623233 | Gemcitabine Plus Bevacizumab in Locally Recurrent or Metastatic Breast Cancer |
| NCT00281697 | A Study to Evaluate the Safety and Efficacy of Bevacizumab in Combination With Chemotherapy in Previously Treated Metastatic Breast Cancer (RIBBON 2) |
| NCT01215123 | An Observational Study of Avastin (Bevacizumab) in Patients With Metastatic Breast Cancer |
| NCT01004172 | Carboplatin and Bevacizumab for Progressive Breast Cancer Brain Metastases |
| NCT00472693 | Bevacizumab and Abraxane as Second-line Therapy in Triple Negative Metastatic Breast Cancer |
| BNT323 | NCT06827236 | A Clinical Study to Find the Optimal Dose of an Investigational Treatment Called BNT323 When Used in Combination With Another Investigational Treatment, BNT327, and to Test if That Combination Treatment is Safe and Beneficial for Patients With Advanced Breast Cancer |
| NCT06265428 | A Study to Compare DB-1303/​BNT323 Versus T-DM1 in Breast Cancer |
| NCT06018337 | A Study of DB-1303/​BNT323 vs Investigator's Choice Chemotherapy in HER2-Low, Hormone Receptor Positive Metastatic Breast Cancer (DYNASTY-Breast02) |
| Apatinib | NCT05192798 | Albumin-Bound Paclitaxel Combined With Antiangiogenic Agents in First-line Treatment of Relapsed or Metastatic TNBC |
| NCT01653561 | A Study of Apatinib in Non-triple-negative Metastatic Breast Cancer |
| NCT03086785 | Prospective, Multicenter, Observational Study of Apatinib Single or Combined Capecitabine for Treatment of Patients With Metastatic Her-2 Negative Breast Cancer |
| NCT02878057 | Multicenter Phase II Study of Apatinib in Patients With Advanced Breast Cancer(CABC006) |
| NCT06889688 | Phase III Trial of Camrelizumab+Apatinib+Eribulin vs. Physician's Choice Chemotherapy in Advanced Triple-Negative Breast Cancer |
| NCT05759572 | Apatinib With CDK4/​6 Inhibitor and Endocrine Therapy in HR+/​ HER2- Advanced Breast Cancer |
| NCT03535961 | Apatinib Combined With Oral Etoposide in Metastatic HER2 Negative Breast Cancer |
| NCT06418594 | Adebrelimab Plus Apatinib and Etoposide for the Treatment of HER2-Negative Breast Cancer Brain Metastasis |
| NCT02768415 | Study of Apatinib Combined With Oral Vinorelbine in Metastatic HER2 Negative Breast Cancer |
| NCT03945604 | A Trial of SHR-1210 (an Anti-PD-1 Inhibitor) in Combination With Apatinib and Fluzoparib in Patients With TNBC |
| NCT04335006 | A Phase 3 Study Comparing Carelizumab Plus Nab-paclitaxel and Apatinib, Carelizumab Plus Nab-paclitaxel, and Nab-paclitaxel in Patients With Advanced Triple Negative Breast Cancer. |
| NCT03932526 | Combined Use of Apatinib Mesylate and Vinorelbine Versus Single Use of Vinorelbine in Triple-negative Breast Cancer |
| NCT04296370 | A Study of Fluzoparib±Apatinib Versus Chemotherapy Treatment of Physician's Choice in HER2-negative Metastatic Breast Cancer Patients With Germline BRCA Mutation |
| Lucitanib | NCT02202746 | A Study to Assess the Safety and Efficacy of the VEGFR-FGFR-PDGFR Inhibitor, Lucitanib, Given to Patients With Metastatic Breast Cancer |
| NCT02053636 | A Phase II Trial Testing Oral Administration of Lucitanib in Patients With Fibroblast Growth Factor Receptor (FGFR)1-amplified or Non-amplified Estrogen Receptor Positive Metastatic Breast Cancer (FINESSE) |
| erlotinib | NCT00054132 | Erlotinib Hydrochloride and Bevacizumab in Treating Patients With Stage IV Breast Cancer |
| NCT00739063 | Phase II Study of Erlotinib, an EGFR Inhibitor in Metastatic EGFR-positive 'Triple Receptor-negative' Breast Cancer |
| NCT00574366 | Erlotinib and Everolimus in Treating Patients With Metastatic Breast Cancer |
| NCT00109265 | A Study to Evaluate Erlotinib in Patients With Advanced or Metastatic Breast Cancer During or Following Chemotherapy |
| NCT00834678 | Bendamustine and Erlotinib in Treating Patients With Stage IIIB, Stage IIIC, or Stage IV Breast Cancer |
| NCT00030537 | Erlotinib in Treating Patients With Locally Advanced or Metastatic Breast Cancer |
| NCT00570258 | Randomized, Double Blind Multicenter Phase II Study of Time to Progression on Fulvestrant in Combination With Erlotinib or Placebo in Hormone Receptor-Positive Metastatic Breast Cancer (MBC) Subjects Who Progressed on First Line Hormonal Therapy |
| NCT00054275 | Erlotinib Plus Docetaxel in Treating Patients With Stage IV or Recurrent Breast Cancer |
| NCT00059852 | Erlotinib and Gemcitabine in Treating Patients With Metastatic Breast Cancer Previously Treated With An Anthracycline and/​or a Taxane |
| NCT00033514 | Trastuzumab and Erlotinib as First-Line Therapy in Treating Women With Metastatic Breast Cancer Associated With HER2/​Neu Overexpression |
| NCT01205685 | Endocrine Therapy + OSI-906 With or Without Erlotinib for Hormone-Sensitive Metastatic Breast Cancer |
| NCT01013506 | Phase 2, Endocrine Therapy + OSI-906 With or Without Erlotinib for Hormone-sensitive Metastatic Breast Cancer |
| NCT01594398 | Study to Assess Food Effect on Pharmacokinetics of Entinostat in Subjects With Breast Cancer or Non-Small Cell Lung Cancer (ENCORE110) |
| NCT00733408 | Nab-Paclitaxel and Bevacizumab Followed By Bevacizumab and Erlotinib in Metastatic Breast Cancer |
| NCT00030498 | Erlotinib in Treating Patients With Solid Tumors and Liver or Kidney Dysfunction |
| **IGF-1** | [225Ac]-FPI-1434 | NCT03746431 | A Phase 1 Study of [225Ac]-FPI-1434 Injection |
| **GSK3β** | 9-ING-41 | NCT03678883 | 9-ING-41 in Patients with Advanced Cancers |
| **EGFR** | SCT200 | NCT03692689 | Safety and Efficacy of SCT200 in Patients With Relapsed or Metastatic Triple Receptor Negative Breast Cancer |
| TAS2940 | NCT04982926 | A Study of TAS2940 in Participants With Locally Advanced or Metastatic Solid Tumor Cancer |
| Poziotinib | NCT02544997 | A Phase II, Single-Arm Trial of Poziotinib as Salvage Treatment in Patients With Metastatic Breast Cancer Who Has HER2 or EGFR Mutation or Activated AR or EGFR Pathway |
| NCT02418689 | Poziotinib in Patients With HER2+ Recurrent Stage IV BC Who Have Received at Least 2 Prior HER2-directed Regimens |
| NCT02659514 | Study of Poziotinib in Participants With HER2-Positive Metastatic Breast Cancer |
| NCT03429101 | A Study of Poziotinib in Combination With T-DM1 in HER2-Positive Breast Cancer |
| Lapatinib | NCT02073916 | T-DM1 With Abraxane and Lapatinib for Metastatic HER2 Positive Breast Cancer (STELA) |
| NCT00694252 | Lapatinib and Circulating Tumor Cells in Breast Cancer |
| NCT01118975 | GCC 0845:Vorinostat and Lapatinib in Advanced Solid Tumors and Advanced Breast Cancer to Evaluate Response and Biomarkers |
| NCT00759642 | Lapatinib in Women With Metastatic Breast Cancer Who Have Failed Prior Antihormone Therapy |
| NCT00225758 | Lapatinib in Metastatic Breast Cancer Resistant to Hormone Therapy |
| NCT00477464 | Lapatinib in Combination With Capecitabine in Japanese Patients With Metastatic Breast Cancer |
| NCT00089999 | Lapatinib In Chemotherapy-Naive Or Metastatic Breast Cancer |
| NCT01730677 | Lapatinib+Vinorelbine vs Vinorelbine HER2 Positive Metastatic Breast Cancer Progressed After Lapatinib/​Trastuzumab (LV) |
| NCT00444535 | Lapatinib and Bevacizumab for Metastatic Breast Cancer |
| NCT01044485 | Lapatinib in Combination With Docetaxel in Patients With HER-2 Positive Advanced or Metastatic Breast Cancer (LapDoc) |
| NCT01283789 | Lapatinib and RAD-001 for HER2 Positive Metastatic Breast Cancer |
| NCT00320385 | Lapatinib In Combination With Trastuzumab Versus Lapatinib Monotherapy In Subjects With HER2-positive Metastatic Breast Cancer |
| SYS6010 | NCT06775236 | Clinical Trial of SYS6010±SYH2051 Versus Chemotherapy in Advanced Breast Cancer and Other Solid Tumors |
| AZD4547 | NCT02299999 | SAFIR02_Breast - Efficacy of Genome Analysis as a Therapeutic Decision Tool for Patients With Metastatic Breast Cancer (SAFIR02_Breast) |
| NCT01202591 | Safety and Efficacy of AZD4547 in Combination With Fulvestrant vs. Fulvestrant Alone in ER+ Breast Cancer Patients (GLOW) |
| Gefitinib | NCT01732276 | The Safety and Effects of Gefitinib in Triple-negative,EGFR Positive Metastatic Breast Cancer |
| NCT00066339 | Gefitinib in Treating Patients With Metastatic Breast Cancer That Has Progressed After Antiestrogen and Nonsteroidal Aromatase Inhibitor Therapy |
| NCT00066378 | Anastrozole With or Without Gefitinib in Treating Postmenopausal Women With Metastatic or Locally Recurrent Breast Cancer |
| NCT00086957 | Gefitinib, Trastuzumab, and Docetaxel in Treating Patients With Metastatic Breast Cancer |
| NCT00080743 | Gefitinib With or Without Tamoxifen in Treating Patients With Tamoxifen-Resistant Metastatic Breast Cancer |
| NCT00024154 | Trastuzumab and Gefitinib in Treating Patients With Metastatic Breast Cancer |
| **ROS1** | Entrectinib | NCT02650401 | Study Of Entrectinib (Rxdx-101) in Children and Adolescents With Locally Advanced Or Metastatic Solid Or Primary CNS Tumors And/​Or Who Have No Satisfactory Treatment Options (STARTRK-NG) |
| NCT02568267 | Basket Study of Entrectinib (RXDX-101) for the Treatment of Patients With Solid Tumors Harboring NTRK 1/​2/​3 (Trk A/​B/​C), ROS1, or ALK Gene Rearrangements (Fusions) (STARTRK-2) |
| Taletrectinib | NCT06214793 | Taletrectinib in Previously Treated Metastatic CDH1-mutated Invasive Lobular Cancer (ILC) |
| **PIK3CB** | AZD8186 | NCT03218826 | PI3Kbeta Inhibitor AZD8186 and Docetaxel in Treating Patients Advanced Solid Tumors With PTEN or PIK3CB Mutations That Are Metastatic or Cannot Be Removed by Surgery |
